# Supplementary material for: Accumulation and re-release of metallic pollutants during drinking water distribution and health risk assessment
Source: Royal Society of Chemistry journal article supplement (doi:10.1039/c9ew00291j), 2019-01-01
Supplement: c9ew00291j1.pdf [file c9ew00291j1.pdf]

Supporting information

Table S1 Average values of non-metallic parameters (all values are in  $\text{mg}\cdot\text{L}^{-1}$  except pH).

|    | Parameters     | pH        | $\text{NH}_3\text{-N}$ | $\text{COD}_{\text{Mn}}$ | Total Hardness | $\text{Cl}^-$ | $\text{NO}_3^-$ | $\text{SO}_4^{2-}$ | $\text{F}^-$ |
|----|----------------|-----------|------------------------|--------------------------|----------------|---------------|-----------------|--------------------|--------------|
| YX | Finished water | 7.65      | 0.09                   | 0.92                     | 92.08          | 8.33          | 6.34            | 29.12              | 0.19         |
|    | Tap water      | 7.73±0.15 | 0.10±0.02              | 0.88±0.14                | 96.32±25.99    | 10.44±9.02    | 6.08±1.05       | 29.97±3.96         | 0.20±0.06    |
| GY | Finished water | 7.97      | 0.76                   | 3.56                     | 197.79         | 73.81         | 10.03           | 63.38              | 0.49         |
|    | Tap water      | 7.94±0.04 | 0.66±0.52              | 3.61±0.61                | 206.5±15.46    | 78.17±12.27   | 10.37±1.62      | 62.63±16.38        | 0.49±0.03    |
| YZ | Finished water | 7.37      | 0.17                   | 1.37                     | 182.16         | 63.97         | 8.58            | 40.16              | 0.40         |
|    | Tap water      | 7.50±0.12 | 0.15±0.06              | 1.74±0.12                | 171.09±7.0     | 55.99±6.17    | 8.16±0.32       | 38.77±0.75         | 0.38±0.02    |
| SY | Finished water | 7.66      | 0.22                   | 2.62                     | 228.21         | 75.45         | 8.38            | 77.60              | 0.58         |
|    | Tap water      | 7.68±0.18 | 0.23±0.15              | 2.60±0.35                | 232.96±18.48   | 68.78±6.87    | 8.50±2.13       | 64.60±11.63        | 0.56±0.07    |
| XZ | Finished water | 7.84      | 0.13a                  | 5.75                     | 268.24         | 70.79         | 6.90            | 100.82             | 0.57         |
|    | Tap water      | 7.32±0.32 | 0.05±0.04              | 2.43±1.38                | 338.05±108.12  | 50.34±19.55   | 22.28±11.78     | 73.20±17.62        | 0.35±0.26    |

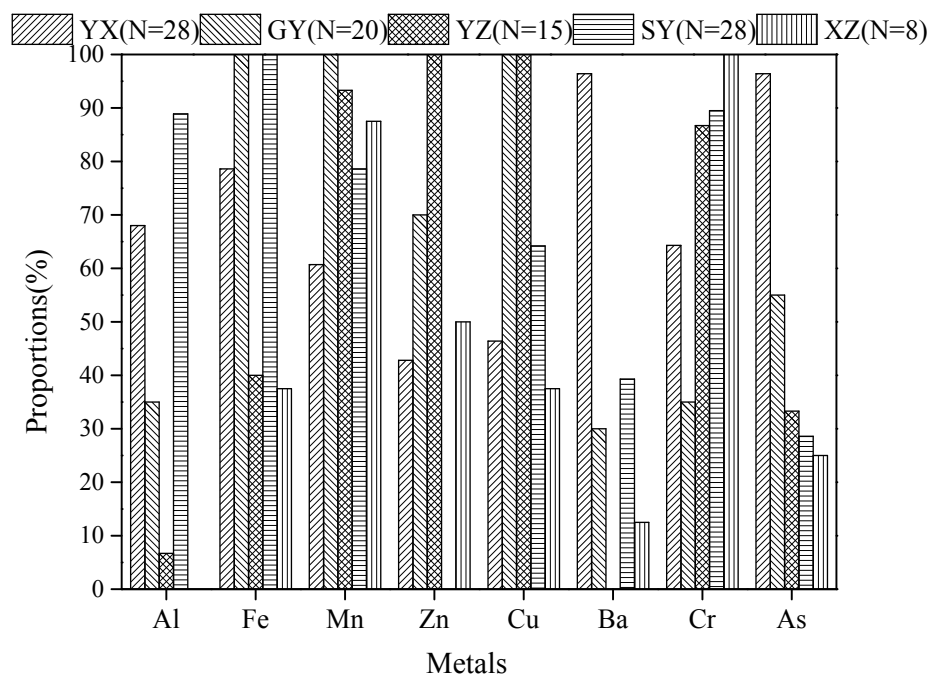

Fig.S1 The proportion of metals concentrations in tap water exceeds the finished water for five areas (%)

Table S2 Water quality standards for drinking water ( $\mu\text{g}\cdot\text{L}^{-1}$ )

|    | China <sup>a</sup> | WHO <sup>b</sup> | USEPA <sup>c</sup> |      |
|----|--------------------|------------------|--------------------|------|
|    |                    |                  | MCLG               | MCL  |
| Al | 200                | 200              | -                  | -    |
| Fe | 300                | 300              | -                  | -    |
| Mn | 100                | 400              | -                  | -    |
| Zn | 1000               | -                | -                  | -    |
| Cu | 1000               | 2000             | 1300               | 1300 |
| Ba | 700                | 700              | 2000               | 2000 |
| Cr | 50                 | 50               | 100                | 100  |
| As | 10                 | 10               | 10                 | 10   |

<sup>a</sup> Chinese drinking water regulation (GB 5749-2006).

<sup>b</sup> WHO (2011) drinking water guidelines.

<sup>c</sup> US EPA (2003) drinking water standards.

Table S3 Correlation coefficients of metal concentrations and quality parameters in the source water.

|    | Al | Fe      | Mn     | Zn     | Cu      | Ba      | Cr      | As      | pH     | Cl <sup>-</sup> | NO <sub>3</sub> <sup>-</sup> | SO <sub>4</sub> <sup>2-</sup> |
|----|----|---------|--------|--------|---------|---------|---------|---------|--------|-----------------|------------------------------|-------------------------------|
| Al | 1  | 0.804** | -0.161 | 0.237  | 0.34    | 0.622*  | 0.985** | 0.877** | -0.031 | 0.492           | 0.421                        | 0.182                         |
| Fe |    | 1       | -0.021 | 0.679* | 0.731*  | 0.805** | 0.779*  | 0.890** | 0.041  | 0.989**         | 0.247                        | 0.940**                       |
| Mn |    |         | 1      | 0.443  | 0.381   | -0.467  | -0.406  | -0.686* | -0.42  | -0.256          | -0.059                       | -0.127                        |
| Zn |    |         |        | 1      | 0.979** | 0.17    | 0.755*  | 0.529   | -0.11  | 0.526           | 0.239                        | 0.404                         |
| Cu |    |         |        |        | 1       | 0.217   | 0.833*  | 0.808** | -0.128 | 0.505           | 0.304                        | 0.316                         |

|                               |   |       |         |       |         |        |         |
|-------------------------------|---|-------|---------|-------|---------|--------|---------|
| Ba                            | 1 | 0.531 | 0.843** | 0.246 | 0.851** | -0.045 | 0.826*  |
| Cr                            |   | 1     | 0.808*  | 0.036 | 0.391   | 0.283  | 0.098   |
| As                            |   |       | 1       | 0.365 | 0.781   | 0.008  | 0.488   |
| pH                            |   |       |         | 1     | 0.722*  | -0.019 | 0.729*  |
| Cl <sup>-</sup>               |   |       |         |       | 1       | 0.285  | 0.882** |
| NO <sub>3</sub> <sup>-</sup>  |   |       |         |       |         | 1      | -0.015  |
| SO <sub>4</sub> <sup>2-</sup> |   |       |         |       |         |        | 1       |

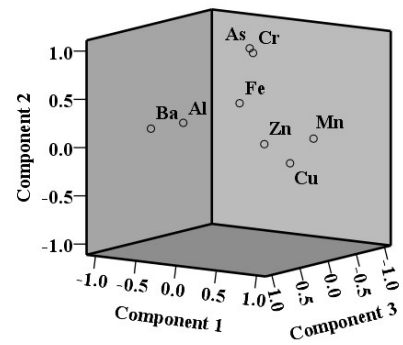

(a)

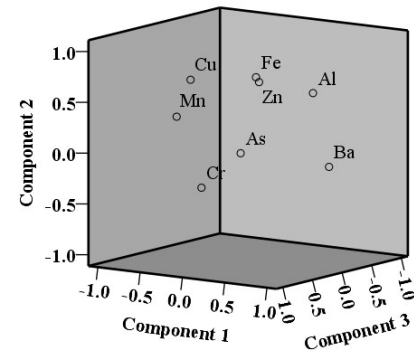

(b)

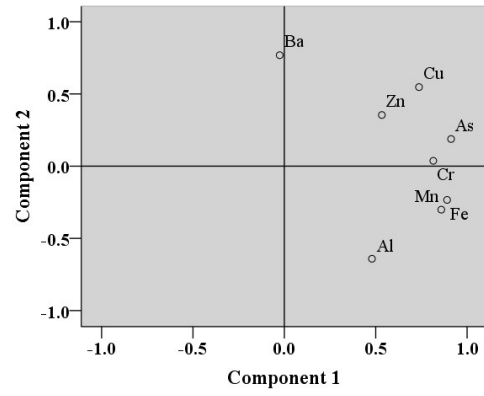

(c)

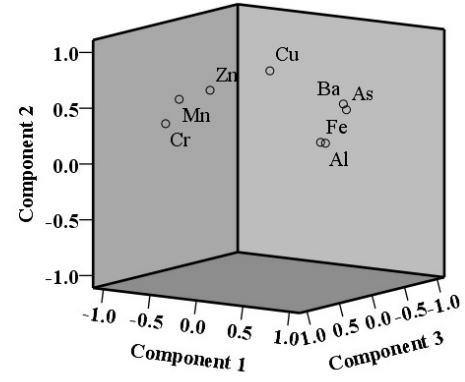

(d)

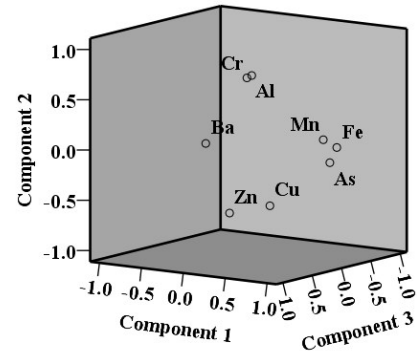

(e)

Fig S2 A component plot in rotated space of metal loadings for five areas: (a) YX; (b) GY; (c) SY; (d) XZ; (e) YZ

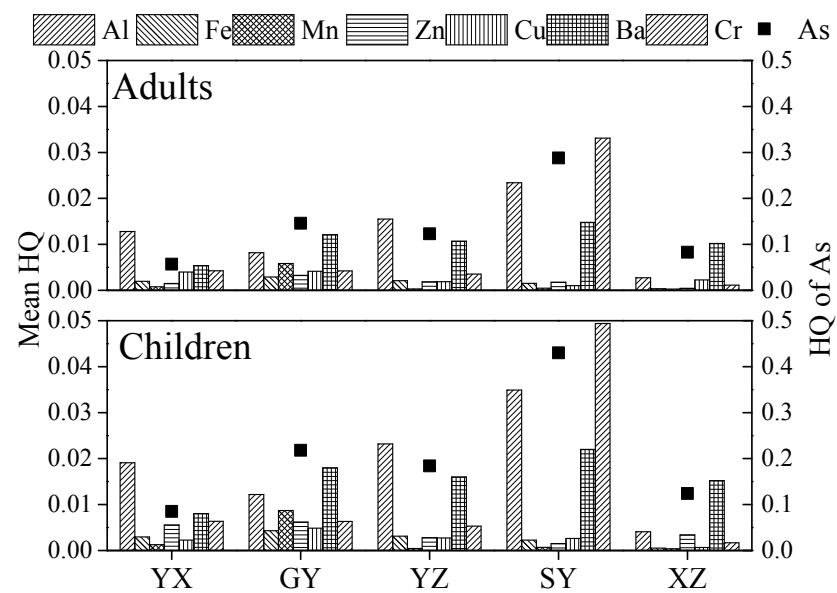

Fig.S3 Mean HQ of metals in the tap water for adults and children of different areas
